# Supplementary material
Source: publisher figshare collection journal article supplement (https://acs.figshare.com/ndownloader/files/5716134)
Supplement: Supplementary file 1 [file 5716134]

# ic991430x.cif

data_shel93                                             
 
_audit_creation_method            SHELXL 
_chemical_name_systematic 
; 
 ? 
; 
_chemical_name_common             ? 
_chemical_formula_moiety          ? 
_chemical_formula_structural      '[Mn3(SALADHP)2(HSAL)4.2CH3CN]' 
_chemical_formula_analytical      '[Mn3(C11 H13 N O3)2 (C7 H5 O3)4. 2CH3CN]'
_chemical_formula_sum             'C54 H52 Mn3 N4 O18' 
_chemical_formula_weight          1209.82 
_chemical_melting_point           ? 
_chemical_compound_source         ? 
 
loop_ 
 _atom_type_symbol 
 _atom_type_description 
 _atom_type_scat_dispersion_real 
 _atom_type_scat_dispersion_imag 
 _atom_type_scat_source 
 'C'  'C'   0.0033   0.0016 
 'International Tables Vol C Tables 4.2.6.8 and 6.1.1.4' 
 'H'  'H'   0.0000   0.0000 
 'International Tables Vol C Tables 4.2.6.8 and 6.1.1.4' 
 'N'  'N'   0.0061   0.0033 
 'International Tables Vol C Tables 4.2.6.8 and 6.1.1.4' 
 'O'  'O'   0.0106   0.0060 
 'International Tables Vol C Tables 4.2.6.8 and 6.1.1.4' 
 'Mn'  'Mn'   0.3368   0.7283 
 'International Tables Vol C Tables 4.2.6.8 and 6.1.1.4' 
 
_symmetry_cell_setting            'ticlinic' 
_symmetry_space_group_name_H-M    P-1 
 
loop_ 
 _symmetry_equiv_pos_as_xyz 
 'x, y, z' 
 '-x, -y, -z' 
 
_cell_length_a                    10.367(6) 
_cell_length_b                    11.369(6) 
_cell_length_c                    13.967(8) 
_cell_angle_alpha                 112.56(1) 
_cell_angle_beta                  93.42(2) 
_cell_angle_gamma                 115.43(1) 
_cell_volume                      1322.3(1) 
_cell_formula_units_Z             1 
_cell_measurement_temperature     298 
_cell_measurement_reflns_used     25 
_cell_measurement_theta_min       5.4 
_cell_measurement_theta_max       11.7 
 
_exptl_crystal_description        'parallelepiped' 
_exptl_crystal_colour             'brown' 
_exptl_crystal_size_max           0.50 
_exptl_crystal_size_mid           0.25 
_exptl_crystal_size_min           0.20 
_exptl_crystal_density_meas       1.50 
_exptl_crystal_density_diffrn     1.519 
_exptl_crystal_density_method     'floating method' 
_exptl_crystal_F_000              623 
_exptl_absorpt_coefficient_mu     0.785 
_exptl_absorpt_correction_type    'none' 
_exptl_absorpt_correction_T_min   ? 
_exptl_absorpt_correction_T_max   ? 
 
_exptl_special_details 
; 
 ? 
; 
 
_diffrn_ambient_temperature       298 
_diffrn_radiation_wavelength      0.71073 
_diffrn_radiation_type            MoK\a 
_diffrn_radiation_source          'fine-focus sealed tube' 
_diffrn_radiation_monochromator   graphite 
_diffrn_measurement_device        'Crystal Logic Dual Goniometer Diffractometer' 
_diffrn_measurement_method        'profile data from \w scans' 
_diffrn_standards_number          3 
_diffrn_standards_interval_count  97 
_diffrn_standards_interval_time   ? 
_diffrn_standards_decay_%         -4.3 
_diffrn_reflns_number             4953 
_diffrn_reflns_av_R_equivalents   0.0106 
_diffrn_reflns_av_sigmaI/netI     0.0445 
_diffrn_reflns_limit_h_min        -12 
_diffrn_reflns_limit_h_max        0 
_diffrn_reflns_limit_k_min        -12 
_diffrn_reflns_limit_k_max        13 
_diffrn_reflns_limit_l_min        -16 
_diffrn_reflns_limit_l_max        16 
_diffrn_reflns_theta_min          2.08 
_diffrn_reflns_theta_max          25.00 
_reflns_number_total              4668 
_reflns_number_observed           4093 
_reflns_observed_criterion        >2sigma(I) 
 
_computing_data_collection        'Program COLLECT (UCLA Crystallographic Package)' 
_computing_cell_refinement        'Program LEAST (UCLA Crystallographic Package)' 
_computing_data_reduction         'Program REDUCE (UCLA Crystallographic Package)' 
_computing_structure_solution     'SHELXS-86 (Sheldrick, 1990)' 
_computing_structure_refinement   'SHELXL-93 (Sheldrick, 1993)' 
_computing_molecular_graphics     'ORTEP' 
_computing_publication_material   ? 
 
_refine_special_details 
; 
 Refinement on F^2^ for ALL reflections except for 2 with very negative F^2^ 
 or flagged by the user for potential systematic errors.  Weighted R-factors 
 wR and all goodnesses of fit S are based on F^2^, conventional R-factors R 
 are based on F, with F set to zero for negative F^2^. The observed criterion 
 of F^2^ > 2sigma(F^2^) is used only for calculating _R_factor_obs etc. and is 
 not relevant to the choice of reflections for refinement.  R-factors based 
 on F^2^ are statistically about twice as large as those based on F, and R- 
 factors based on ALL data will be even larger. 
; 
 
_refine_ls_structure_factor_coef  Fsqd  
_refine_ls_matrix_type            full 
_refine_ls_weighting_scheme 
 'calc w=1/[\s^2^(Fo^2^)+(0.0231P)^2^+0.6824P] where P=(Fo^2^+2Fc^2^)/3' 
_atom_sites_solution_primary      direct 
_atom_sites_solution_secondary    difmap 
_atom_sites_solution_hydrogens    geom 
_refine_ls_hydrogen_treatment     ? 
_refine_ls_extinction_method      none 
_refine_ls_extinction_coef        ? 
_refine_ls_number_reflns          4666 
_refine_ls_number_parameters      464 
_refine_ls_number_restraints      0 
_refine_ls_R_factor_all           0.0358 
_refine_ls_R_factor_obs           0.0302 
_refine_ls_wR_factor_all          0.0879 
_refine_ls_wR_factor_obs          0.0829 
_refine_ls_goodness_of_fit_all    1.072 
_refine_ls_goodness_of_fit_obs    1.096 
_refine_ls_restrained_S_all       1.079 
_refine_ls_restrained_S_obs       1.096 
_refine_ls_shift/esd_max          -0.130 
_refine_ls_shift/esd_mean         0.013 
 
loop_ 
 _atom_site_label 
 _atom_site_type_symbol 
 _atom_site_fract_x 
 _atom_site_fract_y 
 _atom_site_fract_z 
 _atom_site_U_iso_or_equiv 
 _atom_site_thermal_displace_type 
 _atom_site_occupancy 
 _atom_site_calc_flag 
 _atom_site_refinement_flags 
 _atom_site_disorder_group 
Mn1 Mn 0.0000 0.0000 0.0000 0.02980(12) Uani 1 d S . 
Mn2 Mn 0.30971(3) 0.01141(3) 0.12602(2) 0.03055(10) Uani 1 d . . 
O1 O 0.5101(2) 0.0896(2) 0.18826(13) 0.0397(4) Uani 1 d . . 
O2 O 0.10602(15) -0.0967(2) 0.05699(12) 0.0329(3) Uani 1 d . . 
N1 N 0.2528(2) -0.0970(2) 0.21252(14) 0.0330(4) Uani 1 d . . 
O4 O 0.3750(2) 0.0745(2) 0.01763(12) 0.0384(3) Uani 1 d . . 
O5 O 0.1987(2) 0.1069(2) -0.04878(13) 0.0430(4) Uani 1 d . . 
O7 O 0.3144(2) 0.2138(2) 0.21945(13) 0.0431(4) Uani 1 d . . 
O8 O 0.1000(2) 0.1916(2) 0.15249(13) 0.0453(4) Uani 1 d . . 
C1 C 0.5769(2) 0.0592(2) 0.2515(2) 0.0351(5) Uani 1 d . . 
C2 C 0.7316(3) 0.1235(3) 0.2755(2) 0.0440(6) Uani 1 d . . 
C3 C 0.8070(3) 0.0992(3) 0.3435(2) 0.0533(7) Uani 1 d . . 
C4 C 0.7330(3) 0.0095(3) 0.3889(2) 0.0596(7) Uani 1 d . . 
C5 C 0.5816(3) -0.0567(3) 0.3651(2) 0.0508(6) Uani 1 d . . 
C6 C 0.5003(2) -0.0329(2) 0.2966(2) 0.0366(5) Uani 1 d . . 
C7 C 0.3420(3) -0.1038(3) 0.2757(2) 0.0380(5) Uani 1 d . . 
C8 C 0.0890(2) -0.1721(2) 0.1971(2) 0.0376(5) Uani 1 d . . 
C9 C 0.0265(2) -0.2165(2) 0.0795(2) 0.0368(5) Uani 1 d . . 
C10 C 0.0513(3) -0.0597(3) 0.2728(2) 0.0472(6) Uani 1 d . . 
C11 C 0.0299(3) -0.3057(3) 0.2184(3) 0.0533(7) Uani 1 d . . 
O3 O 0.1302(4) -0.0063(4) 0.3798(2) 0.0677(10) Uani 0.709(5) d P . 
HO3 H 0.1254 0.0800 0.4268 0.080 Uiso 0.71 d P . 
O3A O 0.0515(7) -0.4105(7) 0.1573(6) 0.057(2) Uani 0.291(5) d P . 
C12 C 0.3283(2) 0.1327(2) -0.0297(2) 0.0322(4) Uani 1 d . . 
C13 C 0.4434(2) 0.2380(2) -0.0581(2) 0.0336(4) Uani 1 d . . 
C14 C 0.4010(3) 0.2987(3) -0.1147(2) 0.0447(5) Uani 1 d . . 
C15 C 0.5033(3) 0.4011(3) -0.1398(2) 0.0542(7) Uani 1 d . . 
C16 C 0.6522(3) 0.4464(3) -0.1068(2) 0.0524(6) Uani 1 d . . 
C17 C 0.6968(3) 0.3883(3) -0.0509(2) 0.0460(6) Uani 1 d . . 
C18 C 0.5943(2) 0.2816(2) -0.0280(2) 0.0374(5) Uani 1 d . . 
O6 O 0.6493(2) 0.2237(2) 0.0212(2) 0.0540(5) Uani 1 d . . 
C19 C 0.2250(2) 0.2607(2) 0.2207(2) 0.0343(5) Uani 1 d . . 
C20 C 0.2652(2) 0.4078(2) 0.3071(2) 0.0341(5) Uani 1 d . . 
C21 C 0.4032(3) 0.4937(3) 0.3824(2) 0.0473(6) Uani 1 d . . 
C22 C 0.4432(4) 0.6295(3) 0.4628(2) 0.0597(7) Uani 1 d . . 
C23 C 0.3424(4) 0.6798(3) 0.4717(2) 0.0580(7) Uani 1 d . . 
C24 C 0.2053(3) 0.5976(3) 0.3993(2) 0.0527(6) Uani 1 d . . 
C25 C 0.1662(3) 0.4625(2) 0.3158(2) 0.0396(5) Uani 1 d . . 
O9 O 0.0318(2) 0.3893(2) 0.2429(2) 0.0565(5) Uani 1 d . . 
N2 N 0.1672(4) 0.2797(5) 0.5395(4) 0.1272(15) Uani 1 d . . 
C26 C 0.2054(4) 0.3938(5) 0.6033(4) 0.0844(10) Uani 1 d . . 
C27 C 0.2573(7) 0.5388(5) 0.6853(6) 0.111(2) Uani 1 d . . 
HO6 H 0.5877(37) 0.1757(36) 0.0360(27) 0.067(11) Uiso 1 d . . 
HO9 H 0.0168(37) 0.3010(38) 0.1919(28) 0.081(11) Uiso 1 d . . 
H2 H 0.7823(29) 0.1829(29) 0.2465(21) 0.046(7) Uiso 1 d . . 
H3 H 0.9084(33) 0.1434(30) 0.3590(22) 0.055(8) Uiso 1 d . . 
H4 H 0.7863(34) -0.0075(31) 0.4359(24) 0.062(8) Uiso 1 d . . 
H5 H 0.5267(33) -0.1218(33) 0.3925(24) 0.066(9) Uiso 1 d . . 
H7 H 0.3031(28) -0.1564(28) 0.3171(21) 0.047(7) Uiso 1 d . . 
H9A H 0.0410(23) -0.2954(24) 0.0332(17) 0.027(5) Uiso 1 d . . 
H9B H -0.0794(25) -0.2418(23) 0.0659(17) 0.028(5) Uiso 1 d . . 
H10A H -0.0570(33) -0.1046(31) 0.2608(22) 0.058(8) Uiso 1 d . . 
H10B H 0.0776(33) 0.0213(33) 0.2544(24) 0.064(8) Uiso 1 d . . 
H11A H -0.0697(33) -0.3510(30) 0.1999(22) 0.051(8) Uiso 1 d . . 
H11B H 0.0547(36) -0.2818(35) 0.2931(28) 0.072(10) Uiso 1 d . . 
H14 H 0.3022(33) 0.2665(31) -0.1367(23) 0.057(8) Uiso 1 d . . 
H15 H 0.4717(31) 0.4352(30) -0.1839(23) 0.057(8) Uiso 1 d . . 
H16 H 0.7248(33) 0.5167(31) -0.1209(23) 0.060(8) Uiso 1 d . . 
H17 H 0.7899(35) 0.4176(33) -0.0277(24) 0.061(9) Uiso 1 d . . 
H21 H 0.4728(29) 0.4557(28) 0.3749(20) 0.047(7) Uiso 1 d . . 
H22 H 0.5320(37) 0.6770(36) 0.5058(27) 0.074(10) Uiso 1 d . . 
H23 H 0.3615(34) 0.7652(35) 0.5245(26) 0.070(9) Uiso 1 d . . 
H24 H 0.1294(34) 0.6253(33) 0.4053(25) 0.069(9) Uiso 1 d . . 
H27A H 0.1859(64) 0.5469(59) 0.7264(46) 0.154(20) Uiso 1 d . . 
H27B H 0.3454(63) 0.6054(59) 0.6900(43) 0.143(20) Uiso 1 d . . 
H27C H 0.2106(84) 0.5608(84) 0.6439(62) 0.203(39) Uiso 1 d . . 
 
loop_ 
 _atom_site_aniso_label 
 _atom_site_aniso_U_11 
 _atom_site_aniso_U_22 
 _atom_site_aniso_U_33 
 _atom_site_aniso_U_23 
 _atom_site_aniso_U_13 
 _atom_site_aniso_U_12 
Mn1 0.0250(2) 0.0314(2) 0.0314(2) 0.0135(2) 0.0037(2) 0.0136(2) 
Mn2 0.0251(2) 0.0347(2) 0.0358(2) 0.01944(14) 0.00760(13) 0.01499(14) 
O1 0.0273(7) 0.0472(9) 0.0502(9) 0.0295(8) 0.0081(7) 0.0166(7) 
O2 0.0257(7) 0.0353(8) 0.0399(8) 0.0213(7) 0.0063(6) 0.0133(6) 
N1 0.0311(9) 0.0385(10) 0.0359(9) 0.0208(8) 0.0109(7) 0.0187(8) 
O4 0.0359(8) 0.0490(9) 0.0467(9) 0.0315(8) 0.0168(7) 0.0249(7) 
O5 0.0311(8) 0.0561(10) 0.0543(10) 0.0357(8) 0.0143(7) 0.0219(7) 
O7 0.0381(8) 0.0377(8) 0.0499(9) 0.0133(7) 0.0078(7) 0.0220(7) 
O8 0.0399(9) 0.0393(9) 0.0430(9) 0.0049(7) -0.0012(7) 0.0217(7) 
C1 0.0318(11) 0.0351(11) 0.0339(11) 0.0099(9) 0.0039(9) 0.0183(9) 
C2 0.0336(12) 0.0461(14) 0.0477(14) 0.0160(12) 0.0079(10) 0.0208(11) 
C3 0.0339(13) 0.058(2) 0.060(2) 0.0161(13) 0.0001(12) 0.0264(12) 
C4 0.051(2) 0.073(2) 0.060(2) 0.0279(15) -0.0005(13) 0.0392(15) 
C5 0.052(2) 0.059(2) 0.0506(15) 0.0285(13) 0.0061(12) 0.0326(13) 
C6 0.0359(11) 0.0409(12) 0.0347(11) 0.0153(9) 0.0060(9) 0.0223(10) 
C7 0.0407(12) 0.0429(12) 0.0383(12) 0.0225(10) 0.0117(10) 0.0232(10) 
C8 0.0312(11) 0.0434(12) 0.0488(13) 0.0291(11) 0.0152(10) 0.0190(10) 
C9 0.0293(11) 0.0344(11) 0.0484(13) 0.0225(10) 0.0085(10) 0.0140(9) 
C10 0.0421(14) 0.061(2) 0.0538(15) 0.0315(13) 0.0222(12) 0.0317(13) 
C11 0.044(2) 0.057(2) 0.072(2) 0.046(2) 0.0182(14) 0.0213(13) 
O3 0.090(2) 0.092(2) 0.0405(15) 0.0267(15) 0.0185(14) 0.063(2) 
O3A 0.056(4) 0.059(4) 0.087(5) 0.051(4) 0.034(4) 0.037(3) 
C12 0.0306(11) 0.0357(11) 0.0319(10) 0.0159(9) 0.0092(8) 0.0169(9) 
C13 0.0338(11) 0.0324(11) 0.0353(11) 0.0155(9) 0.0113(9) 0.0164(9) 
C14 0.0401(13) 0.0496(14) 0.0530(14) 0.0292(12) 0.0133(11) 0.0236(11) 
C15 0.061(2) 0.057(2) 0.063(2) 0.0419(14) 0.0200(13) 0.0300(14) 
C16 0.054(2) 0.0425(14) 0.064(2) 0.0324(13) 0.0244(13) 0.0175(12) 
C17 0.0345(13) 0.0424(13) 0.0556(15) 0.0232(12) 0.0148(11) 0.0132(11) 
C18 0.0353(11) 0.0363(11) 0.0412(12) 0.0184(10) 0.0105(9) 0.0171(10) 
O6 0.0322(9) 0.0680(12) 0.0788(13) 0.0512(11) 0.0150(9) 0.0229(9) 
C19 0.0350(11) 0.0356(11) 0.0341(11) 0.0159(9) 0.0090(9) 0.0187(10) 
C20 0.0373(11) 0.0340(11) 0.0317(11) 0.0161(9) 0.0086(9) 0.0172(9) 
C21 0.0441(14) 0.0442(13) 0.0454(13) 0.0133(11) 0.0028(11) 0.0223(12) 
C22 0.059(2) 0.0456(15) 0.0473(15) 0.0083(12) -0.0075(13) 0.0175(14) 
C23 0.085(2) 0.0390(14) 0.0406(14) 0.0081(12) 0.0095(14) 0.0322(15) 
C24 0.070(2) 0.0479(14) 0.0499(15) 0.0190(12) 0.0186(13) 0.0388(14) 
C25 0.0429(12) 0.0390(12) 0.0416(12) 0.0195(10) 0.0126(10) 0.0228(10) 
O9 0.0434(10) 0.0513(11) 0.0688(12) 0.0153(10) 0.0047(9) 0.0299(9) 
N2 0.093(3) 0.101(3) 0.134(3) 0.014(3) 0.018(2) 0.040(2) 
C26 0.066(2) 0.079(3) 0.108(3) 0.041(2) 0.033(2) 0.035(2) 
C27 0.102(4) 0.074(3) 0.170(5) 0.054(3) 0.081(4) 0.048(3) 
 
_geom_special_details 
; 
 All esds (except the esd in the dihedral angle between two l.s. planes) 
 are estimated using the full covariance matrix.  The cell esds are taken 
 into account individually in the estimation of esds in distances, angles 
 and torsion angles; correlations between esds in cell parameters are only 
 used when they are defined by crystal symmetry.  An approximate (isotropic) 
 treatment of cell esds is used for estimating esds involving l.s. planes. 
; 
 
loop_ 
 _geom_bond_atom_site_label_1 
 _geom_bond_atom_site_label_2 
 _geom_bond_distance 
 _geom_bond_site_symmetry_2 
 _geom_bond_publ_flag 
Mn1 O8 2.143(2) 2 ? 
Mn1 O8 2.143(2) . ? 
Mn1 O2 2.157(2) 2 ? 
Mn1 O2 2.157(2) . ? 
Mn1 O5 2.199(2) 2 ? 
Mn1 O5 2.199(2) . ? 
Mn2 O1 1.862(2) . ? 
Mn2 O2 1.876(2) . ? 
Mn2 O4 1.950(2) . ? 
Mn2 N1 1.982(2) . ? 
Mn2 O7 2.142(2) . ? 
O1 C1 1.321(3) . ? 
O2 C9 1.424(3) . ? 
N1 C7 1.287(3) . ? 
N1 C8 1.493(3) . ? 
O4 C12 1.297(3) . ? 
O5 C12 1.234(3) . ? 
O7 C19 1.251(3) . ? 
O8 C19 1.268(3) . ? 
C1 C2 1.400(3) . ? 
C1 C6 1.405(3) . ? 
C2 C3 1.375(4) . ? 
C3 C4 1.383(4) . ? 
C4 C5 1.369(4) . ? 
C5 C6 1.413(3) . ? 
C6 C7 1.434(3) . ? 
C8 C9 1.526(3) . ? 
C8 C11 1.529(3) . ? 
C8 C10 1.532(3) . ? 
C10 O3 1.415(4) . ? 
C11 O3A 1.292(7) . ? 
C12 C13 1.487(3) . ? 
C13 C14 1.390(3) . ? 
C13 C18 1.401(3) . ? 
C14 C15 1.378(4) . ? 
C15 C16 1.382(4) . ? 
C16 C17 1.368(4) . ? 
C17 C18 1.390(3) . ? 
C18 O6 1.361(3) . ? 
C19 C20 1.490(3) . ? 
C20 C21 1.392(3) . ? 
C20 C25 1.399(3) . ? 
C21 C22 1.371(4) . ? 
C22 C23 1.381(4) . ? 
C23 C24 1.371(4) . ? 
C24 C25 1.385(3) . ? 
C25 O9 1.363(3) . ? 
N2 C26 1.124(5) . ? 
C26 C27 1.426(7) . ? 
 
loop_ 
 _geom_angle_atom_site_label_1 
 _geom_angle_atom_site_label_2 
 _geom_angle_atom_site_label_3 
 _geom_angle 
 _geom_angle_site_symmetry_1 
 _geom_angle_site_symmetry_3 
 _geom_angle_publ_flag 
O8 Mn1 O8 180.0 2 . ? 
O8 Mn1 O2 90.68(7) 2 2 ? 
O8 Mn1 O2 89.32(7) . 2 ? 
O8 Mn1 O2 89.31(7) 2 . ? 
O8 Mn1 O2 90.69(7) . . ? 
O2 Mn1 O2 180.0 2 . ? 
O8 Mn1 O5 87.32(7) 2 2 ? 
O8 Mn1 O5 92.68(7) . 2 ? 
O2 Mn1 O5 89.13(7) 2 2 ? 
O2 Mn1 O5 90.87(7) . 2 ? 
O8 Mn1 O5 92.68(7) 2 . ? 
O8 Mn1 O5 87.32(7) . . ? 
O2 Mn1 O5 90.87(7) 2 . ? 
O2 Mn1 O5 89.13(7) . . ? 
O5 Mn1 O5 180.0 2 . ? 
O1 Mn2 O2 170.76(7) . . ? 
O1 Mn2 O4 85.91(7) . . ? 
O2 Mn2 O4 96.97(7) . . ? 
O1 Mn2 N1 91.04(7) . . ? 
O2 Mn2 N1 83.83(7) . . ? 
O4 Mn2 N1 164.38(7) . . ? 
O1 Mn2 O7 92.40(7) . . ? 
O2 Mn2 O7 96.33(7) . . ? 
O4 Mn2 O7 90.65(7) . . ? 
N1 Mn2 O7 104.80(8) . . ? 
C1 O1 Mn2 130.92(14) . . ? 
C9 O2 Mn2 113.82(12) . . ? 
C9 O2 Mn1 122.73(12) . . ? 
Mn2 O2 Mn1 119.98(8) . . ? 
C7 N1 C8 122.3(2) . . ? 
C7 N1 Mn2 126.1(2) . . ? 
C8 N1 Mn2 111.58(13) . . ? 
C12 O4 Mn2 130.86(13) . . ? 
C12 O5 Mn1 136.15(14) . . ? 
C19 O7 Mn2 135.13(15) . . ? 
C19 O8 Mn1 133.16(14) . . ? 
O1 C1 C2 118.1(2) . . ? 
O1 C1 C6 123.2(2) . . ? 
C2 C1 C6 118.7(2) . . ? 
C3 C2 C1 120.5(3) . . ? 
C2 C3 C4 121.3(3) . . ? 
C5 C4 C3 119.2(3) . . ? 
C4 C5 C6 121.1(3) . . ? 
C1 C6 C5 119.2(2) . . ? 
C1 C6 C7 122.3(2) . . ? 
C5 C6 C7 118.6(2) . . ? 
N1 C7 C6 125.9(2) . . ? 
N1 C8 C9 103.3(2) . . ? 
N1 C8 C11 114.2(2) . . ? 
C9 C8 C11 110.8(2) . . ? 
N1 C8 C10 107.5(2) . . ? 
C9 C8 C10 111.2(2) . . ? 
C11 C8 C10 109.7(2) . . ? 
O2 C9 C8 109.3(2) . . ? 
O3 C10 C8 108.7(2) . . ? 
O3A C11 C8 115.7(3) . . ? 
O5 C12 O4 123.6(2) . . ? 
O5 C12 C13 120.9(2) . . ? 
O4 C12 C13 115.4(2) . . ? 
C14 C13 C18 118.3(2) . . ? 
C14 C13 C12 119.0(2) . . ? 
C18 C13 C12 122.7(2) . . ? 
C15 C14 C13 121.7(2) . . ? 
C14 C15 C16 119.4(2) . . ? 
C17 C16 C15 120.1(2) . . ? 
C16 C17 C18 121.1(2) . . ? 
O6 C18 C17 116.4(2) . . ? 
O6 C18 C13 124.2(2) . . ? 
C17 C18 C13 119.4(2) . . ? 
O7 C19 O8 124.6(2) . . ? 
O7 C19 C20 119.1(2) . . ? 
O8 C19 C20 116.4(2) . . ? 
C21 C20 C25 118.4(2) . . ? 
C21 C20 C19 120.1(2) . . ? 
C25 C20 C19 121.5(2) . . ? 
C22 C21 C20 121.4(2) . . ? 
C21 C22 C23 119.3(3) . . ? 
C24 C23 C22 120.8(3) . . ? 
C23 C24 C25 120.1(3) . . ? 
O9 C25 C24 117.5(2) . . ? 
O9 C25 C20 122.5(2) . . ? 
C24 C25 C20 120.0(2) . . ? 
N2 C26 C27 178.6(5) . . ? 
 
_refine_diff_density_max    0.211 
_refine_diff_density_min   -0.319 
_refine_diff_density_rms    0.048 

#===END
